# Supplementary material
Source: PubMed Central journal article supplement (PMC4141891)
Supplement: NIHMS559770-supplement-Supplemental_Data_File___doc___tif__pdf__etc__.pdf [file NIHMS559770-supplement-Supplemental_Data_File___doc___tif__pdf__etc__.pdf]

**Table 1.** Confusion matrix collapsed across all HI listeners for the FT-off condition. Underlined entries denote instances where the response matched the stimulus. "--" indicates confusions where the entry is 0. The list below the table indicates confusions (off-diagonal entries only) that significantly increased or decreased in the other conditions relative to FT-off.

| RESPONSE →<br>STIMULUS ↓ | /f/        | /θ/        | /s/        | /ʃ/        | /tʃ/       | /v/        | /ð/       | /z/        | /dʒ/       |
|--------------------------|------------|------------|------------|------------|------------|------------|-----------|------------|------------|
| /f/                      | <u>142</u> | 96         | 23         | 6          | 2          | 7          | 11        | --         | 1          |
| /θ/                      | 94         | <u>155</u> | 14         | --         | --         | 2          | 19        | 3          | --         |
| /s/                      | 25         | 45         | <u>177</u> | 3          | --         | 7          | 10        | 20         | 1          |
| /ʃ/                      | 1          | 1          | 5          | <u>271</u> | 8          | --         | 2         | --         | --         |
| /tʃ/                     | --         | 3          | --         | 4          | <u>266</u> | 1          | --        | --         | 14         |
| /v/                      | 6          | 18         | 14         | --         | --         | <u>158</u> | 80        | 11         | 1          |
| /ð/                      | 16         | 23         | 15         | 1          | --         | 114        | <u>92</u> | 25         | --         |
| /z/                      | 3          | 7          | 35         | --         | --         | 46         | 21        | <u>175</u> | --         |
| /dʒ/                     | 0          | 1          | 2          | 2          | 42         | 2          | 2         | 4          | <u>233</u> |

**FT:** increase /s/ → [/f/, /θ/, /ʃ/]; /z/ → [/v/, /ð/, /dʒ/]

**WB (FT-off):** decrease [/f/, /v/] → /s/; /s/ → [/f/, /θ/]; and /z/ → [/v/, /θ/, /ð/]

**Table II.** Confusion matrix collapsed across all HI listeners for the NFC-off condition. See Table I for details.

| RESPONSE →<br>STIMULUS ↓ | /f/        | /θ/        | /s/        | /ʃ/        | /tʃ/       | /v/        | /ð/       | /z/        | /dʒ/       |
|--------------------------|------------|------------|------------|------------|------------|------------|-----------|------------|------------|
| /f/                      | <u>165</u> | 81         | 22         | 8          | --         | 3          | 9         | --         | --         |
| /θ/                      | 93         | <u>149</u> | 13         | 1          | --         | 7          | 19        | 4          | --         |
| /s/                      | 35         | 39         | <u>178</u> | 2          | --         | 1          | 15        | 15         | 3          |
| /ʃ/                      | 1          | --         | 3          | <u>274</u> | 10         | --         | --        | --         | --         |
| /tʃ/                     | 2          | 2          | --         | 2          | <u>269</u> | --         | 2         | --         | 11         |
| /v/                      | 15         | 18         | 2          | 1          | --         | <u>175</u> | 58        | 17         | 2          |
| /ð/                      | 11         | 17         | 11         | --         | --         | 124        | <u>81</u> | 40         | 2          |
| /z/                      | 3          | 4          | 30         | 1          | 1          | 40         | 20        | <u>187</u> | --         |
| /dʒ/                     | 2          | 1          | 2          | 3          | 21         | --         | 2         | --         | <u>257</u> |

**NFC:** increase /f/ → /z/

**SED:** decrease /s/ → /θ/; /z/ → /v/

**WB (NFC-off):** decrease /ð/ → /z/; /s/ → [/f/, /θ/]; /z/ → [/v/, /ð/]

**Table III.** Confusion matrix collapsed across all NH listeners for the FT-off condition.

| RESPONSE →<br>STIMULUS ↓ | /f/        | /θ/        | /s/        | /ʃ/        | /tʃ/       | /v/        | /ð/        | /z/        | /dʒ/       |
|--------------------------|------------|------------|------------|------------|------------|------------|------------|------------|------------|
| /f/                      | <u>243</u> | 38         | --         | --         | 1          | 1          | 5          | --         | --         |
| /θ/                      | 84         | <u>190</u> | --         | --         | --         | 6          | 7          | --         | --         |
| /s/                      | --         | --         | <u>284</u> | --         | --         | --         | --         | 4          | --         |
| /ʃ/                      | --         | --         | --         | <u>287</u> | 1          | --         | --         | --         | --         |
| /tʃ/                     | --         | --         | --         | --         | <u>262</u> | --         | --         | --         | 26         |
| /v/                      | --         | 4          | --         | --         | --         | <u>245</u> | 38         | 1          | --         |
| /ð/                      | 2          | 8          | --         | --         | --         | 148        | <u>121</u> | 8          | 1          |
| /z/                      | --         | --         | 7          | --         | --         | --         | --         | <u>281</u> | --         |
| /dʒ/                     | --         | --         | --         | --         | 8          | --         | --         | --         | <u>280</u> |

**FT:** increase [/v/, /θ/] → /ð/; /s/ → [/f/, /θ/, /ð/, /ʃ/]; /z/ → [/v/, /θ/, /ð/, /dʒ/]  
decrease /ð/ → /v/

**WB (FT-off):** increase /f/ → [/θ/, /s/]; /θ/ → /s/; /ð/ → /θ/  
decrease /θ/ → [/f/, /v/]; /ð/ → /v/

**Table IV.** Confusion matrix collapsed across all NH listeners for the NFC-off condition.

| RESPONSE →<br>STIMULUS ↓ | /f/        | /θ/        | /s/        | /ʃ/        | /tʃ/       | /v/        | /ð/        | /z/        | /dʒ/       |
|--------------------------|------------|------------|------------|------------|------------|------------|------------|------------|------------|
| /f/                      | <u>201</u> | 77         | 3          | 3          | 1          | --         | 3          | --         | --         |
| /θ/                      | 17         | <u>238</u> | 13         | --         | --         | 1          | 18         | --         | 1          |
| /s/                      | --         | --         | <u>279</u> | --         | --         | --         | --         | 7          | 2          |
| /ʃ/                      | --         | --         | --         | <u>286</u> | 2          | --         | --         | --         | --         |
| /tʃ/                     | 1          | --         | --         | --         | <u>276</u> | --         | --         | --         | 11         |
| /v/                      | 4          | 7          | --         | --         | --         | <u>228</u> | 48         | 1          | --         |
| /ð/                      | 2          | 12         | 1          | --         | --         | 78         | <u>163</u> | 30         | 1          |
| /z/                      | 1          | --         | 18         | --         | --         | --         | --         | <u>269</u> | --         |
| /dʒ/                     | --         | --         | --         | --         | 4          | --         | 1          | --         | <u>283</u> |

**NFC:** increase /f/ → /s/; /θ/ → /f/; /ð/ → /v/; /s/ → [/f/, /θ/]; /z/ → [/v/, /ð/]  
decrease /ð/ → /z/

**SED:** decrease /ð/ → /z/  
increase /θ/ → /f/

**WB (NFC-off):** decrease /ð/ → /z/
